# Supplementary material for: CO2-controlled reactors: epoxidation in emulsions with droplet size from micron to nanometre scale
Source: Royal Society of Chemistry journal article supplement (doi:10.1039/b921538g), 2010-01-01
Supplement: b921538g.pdf [file b921538g.pdf]

## Supporting Information

### CO<sub>2</sub>-controlled reactors: epoxidation in emulsions with droplet size from micron to nanometer scale

5

Yueju Zhao, Jianling Zhang\*, Buxing Han\*, Suqin Hu, and Wei Li

Center for Molecular Sciences, Institute of Chemistry, Chinese Academy of Sciences, Beijing 100080, China

\*Corresponding author. Fax: 86-10-62559373; tel:86-10-62562821; e-mail: [Zhangjl@iccas.ac.cn](mailto:Zhangjl@iccas.ac.cn); [hanbx@iccas.ac.cn](mailto:hanbx@iccas.ac.cn)

10 **The <sup>1</sup>H NMR spectra:** The <sup>1</sup>H NMR spectrum of a typical upper oil phase sample is shown in Fig. S1a. The chemical shifts of 6.60, 5.65, 5.15 ppm represent the H atoms of styrene, and the peaks of 3.75, 3.03, 2.65 ppm are the H atoms of styrene oxide. The specified chemical shift of surfactant, CTAB, at 3.48 ppm (Fig. S1b) was not observed in the <sup>1</sup>H NMR spectrum of the upper oil phase, indicating that the surfactant was not soluble in the upper oil phase.

15

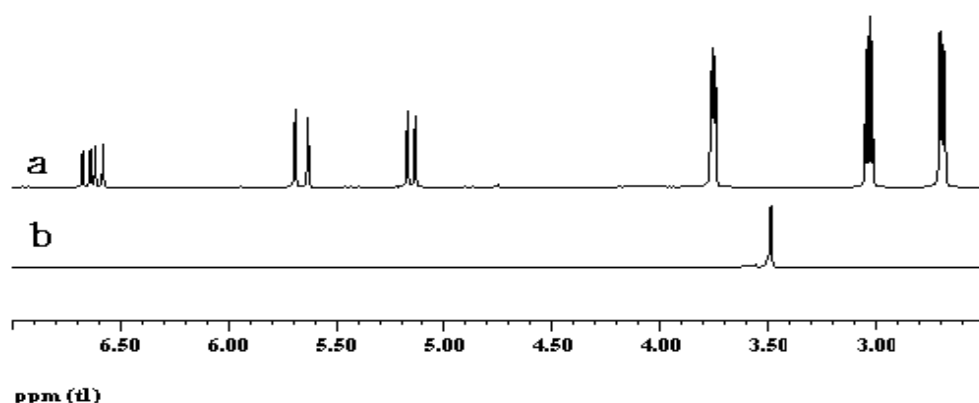

**Fig. S1** (a) the <sup>1</sup>H NMR spectrum of the upper oil phase of the reaction system after the reaction and phase separation (the reaction condition was the same as that in Fig. 2); (b) the <sup>1</sup>H NMR spectrum of CTAB with a concentration of 0.055 M.

20

**SAXS Data Analysis:** Fig. S2 presents typical scattering pattern and distance distribution function of the H<sub>2</sub>O/CTAB/heptane/H<sub>2</sub>O<sub>2</sub>/styrene/CO<sub>2</sub> nanoemulsion with CTAB concentration of 0.055 M using Igor Pro. It indicates that globular droplets are formed because of the bell-shaped of  $p(r)$  function. Pair distance distribution functions of the H<sub>2</sub>O/CTAB/heptane/H<sub>2</sub>O<sub>2</sub>/styrene/CO<sub>2</sub> nanoemulsions with different CTAB concentrations are 25 shown in Fig. S3.

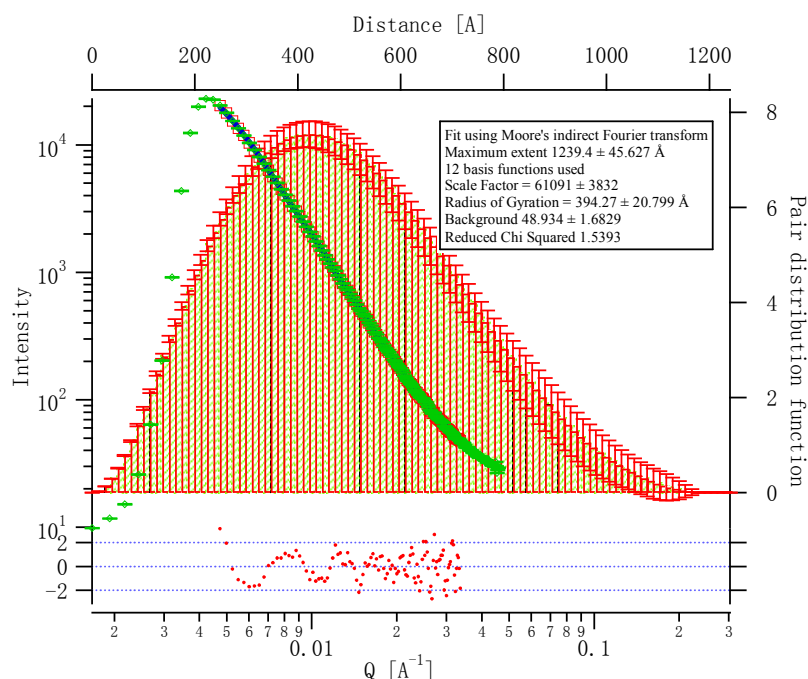

**Fig. S2** Scattering intensity and distance distribution function of the H<sub>2</sub>O/CTAB/heptane/H<sub>2</sub>O<sub>2</sub>/styrene/CO<sub>2</sub> nanoemulsions ( $V_{\text{heptane}}/V_{\text{water}} = 4:5$ ,  $V_{\text{total}} = 6$  mL, 4.5 M H<sub>2</sub>O<sub>2</sub>, 1.5 M styrene, 0.3 M KOH) with CTAB 5 concentration of 0.055M at 40.0 °C and 5.27 MPa.

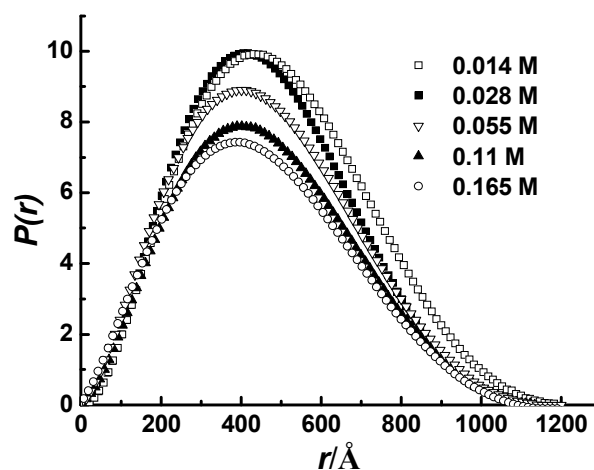

**Fig. S3** Pair distance distribution function of the H<sub>2</sub>O/CTAB/heptane/H<sub>2</sub>O<sub>2</sub>/styrene/CO<sub>2</sub> nanoemulsions ( $V_{\text{heptane}}/V_{\text{water}} = 4:5$ ,  $V_{\text{total}} = 6$  mL, 4.5 M H<sub>2</sub>O<sub>2</sub>, 1.5 M styrene, 0.3 M KOH) with different CTAB concentrations at 40.0 °C and corresponding  $P_T$ .

10

**Nanoemulsion formation with different styrene concentrations:** Fig. S4 shows the  $P_T$  values of the nanoemulsions with different styrene concentrations. Evidently, the  $P_T$  values increased with increasing styrene concentration.

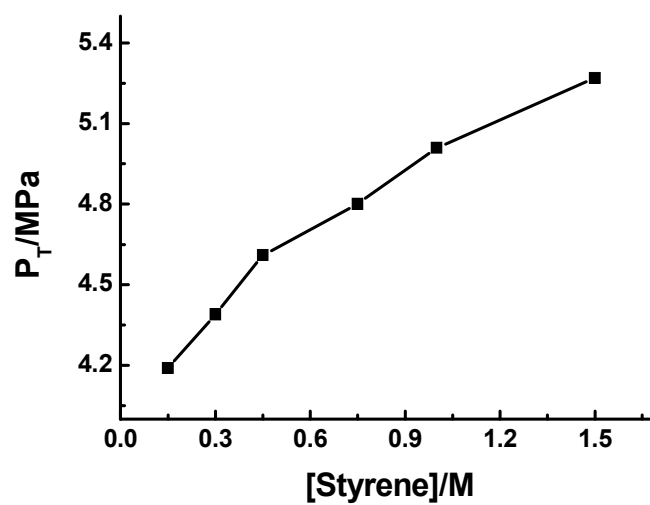

**Fig. S4** Dependence of  $P_T$  on styrene concentration in the  $H_2O/CTAB/heptane/H_2O_2/styrene/CO_2$  nanoemulsions ( $V_{heptane}/V_{water} = 4:5$ ,  $V_{total} = 6$  mL, 0.055 M CTAB, 4.5 M  $H_2O_2$ , 0.3 M KOH).
